# Supplementary material
Source: Springer Nature journal article supplement (https://www.springermedizin.de/resource/supplementary/12936_2005_137_MOESM2_ESM.pdf/9546954)

B PFA0005w  
 B MAL6P1.1  
 C PFD1000c  
 var1 PFE1640w  
 BC PF08\_0103  
 B PFL2665c  
 C PFD0625c  
 B PFB0010w  
 C PF07\_0048  
 B PF13\_0001  
 BC PFL1955w  
 B PFI0005w  
 B PF07\_0139  
 B PF08\_0140  
 B PF11\_0007  
 BC PF08\_0106  
 C PFD0995c  
 BC PF07\_0050  
 C PF07\_0051  
 C PFL1960w  
 B PFC0005w  
 B PF13\_0364  
 C MAL7P1.56  
 C PFD0615c  
 BC PFD0635c  
 var2 PFL0030c  
 C PF08\_0107  
 B PFL0005w  
 A PF11\_0008  
 C PFD1015c  
 B PFD0005w  
 B PFB1055c  
 B PF08\_0142  
 B PFD1245c  
 B PFE0005w  
 B PFI1830c  
 B PFL0935c  
 B PFC1120c  
 C PF07\_0049  
 BC PFL1950w  
 A PFD0020c  
 BC PFD1005c  
 B PFA0765c  
 BC MAL7P1.55  
 BC MAL7P1.50  
 B PF10\_0001  
 BA MAL6P1.316  
 B PF10\_0406  
 BA MAL6P1.4  
 A PF11\_0521  
 A PF08\_0141  
 BA PFL0020w  
 C MAL6P1.252  
 A MAL6P1.314  
 A PFI1820w  
 A PF13\_0003  
 A PFA0015c  
 A PFD1235w

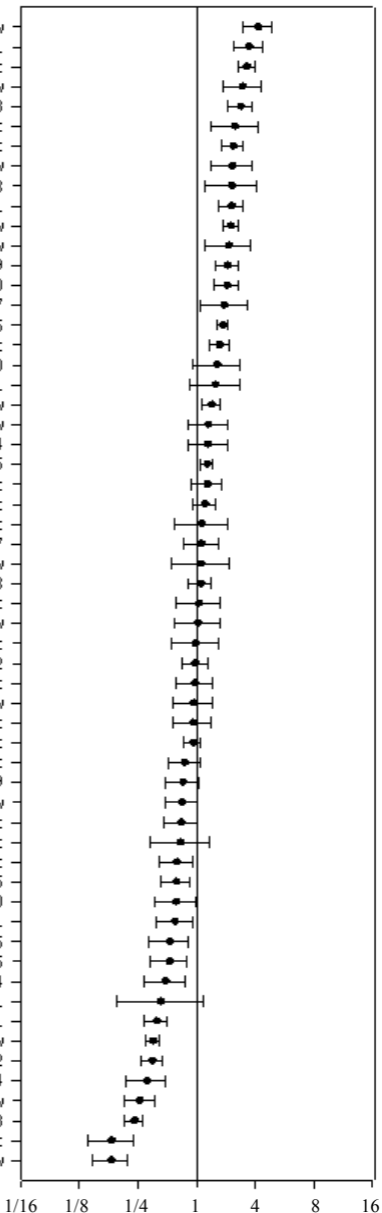

Supplement: MOESM2 [file 9546954]
